# Supplementary material for: Synthesis and fast electron-transfer reactions of fullerene–carbazole dendrimers with short linkages
Source: Royal Society of Chemistry journal article supplement (doi:10.1039/c3nj00770g), 2013-01-01
Supplement: c3nj00770g.pdf [file c3nj00770g.pdf]

## SUPPORTING INFORMATION

### Synthesis and Fast Electron-Transfer Reactions of Fullerene-Carbazole Dendrimers with Short Linkages

Mohamed E. El-Khouly,<sup>a\*</sup> Sang-Ho Lee,<sup>b</sup> Kwang-Yol Kay<sup>b,\*</sup> and Shunichi Fukuzumi<sup>c,d,\*</sup>

<sup>a</sup>*Department of Chemistry, Faculty of Science, Kafr ElSheikh University, Kafr ElSheikh 33516, Egypt*

<sup>b</sup>*Department of Material and Life Science, Graduate School of Engineering, Osaka University, ALCA, Japan Science and Technology Agency (JST), Suita, Osaka 565-0871, Japan*

<sup>c</sup>*Department of Molecular Science and Technology, Ajou University, Suwon 443-749, Korea*

<sup>d</sup>*Department of Bioinspired Science, Ewha Womans University, Seoul 120-750, Korea*

## Figure captions

**Figure S1.** MALDI-TOF mass spectra of compound **1**.

**Figure S2.** MALDI-TOF mass spectra of compound **2**.

**Figure S3.** MALDI-TOF mass spectra of compound **3**.

**Figure S4.** Rise profile of the  $C_{60}^{\cdot-}$  of **1** at 1000 nm shown in Figure 4, monitoring charge separation process.

**Figure S5.** Decay profile of the  $C_{60}^{\cdot-}$  at 1000 nm of **2** in PhCN, monitoring charge separation from carbazole to the singlet  $C_{60}$ .

**Figure S6.** Decay Profiles of the  $C_{60}$  radical anion at 1000 nm of **1** (upper figure), **2** (middle figure), and **3** (lower figure) in deaerated DMF. The concentrations are kept at  $1.0 \times 10^{-4}$  M;  $\lambda_{ex} = 390$  nm.

**Figure S7.** (a) CV and (b) DPV of **1** ( $1.0 \times 10^{-4}$  M) in deaerated PhCN with TBAPF<sub>6</sub> (0.1 M) as support electrolyte in PhCN. Scan rate = 20 mV/s.

**Figure S8.** (a) CV and (b) DPV of **2** ( $1.0 \times 10^{-4}$  M) in deaerated PhCN with TBAPF<sub>6</sub> (0.1 M) as support electrolyte in PhCN. Scan rate = 20 mV/s.

**Figure S9.** (a) CV and (b) DPV of **3** ( $1.0 \times 10^{-4}$  M) in deaerated PhCN with TBAPF<sub>6</sub> (0.1 M) as support electrolyte in PhCN. Scan rate = 20 mV/s.

**Figure S10.** Optimized Frontier molecular orbitals of **1** obtained by using *ab initio* B3LYP/6-311G method.

**Figure S11.** Optimized Frontier molecular orbital of **2** obtained by using *ab initio* B3LYP/6-311G method.

**Figure S12.** (Upper figure) Nanosecond transient absorption spectra of **1** ( $1.0 \times 10^{-4}$  M) in deaerated PhCN;  $\lambda_{ex} = 430$  nm. (Lower figure) Decay profile of  $^3C_{60}^*$  at 700 nm.

**Figure S13.** (Upper figure) Nanosecond transient absorption spectra of **2** ( $1.0 \times 10^{-4}$  M) in deaerated PhCN;  $\lambda_{ex} = 430$  nm. (Lower figure) Decay profile of  $^3C_{60}^*$  at 700 nm.

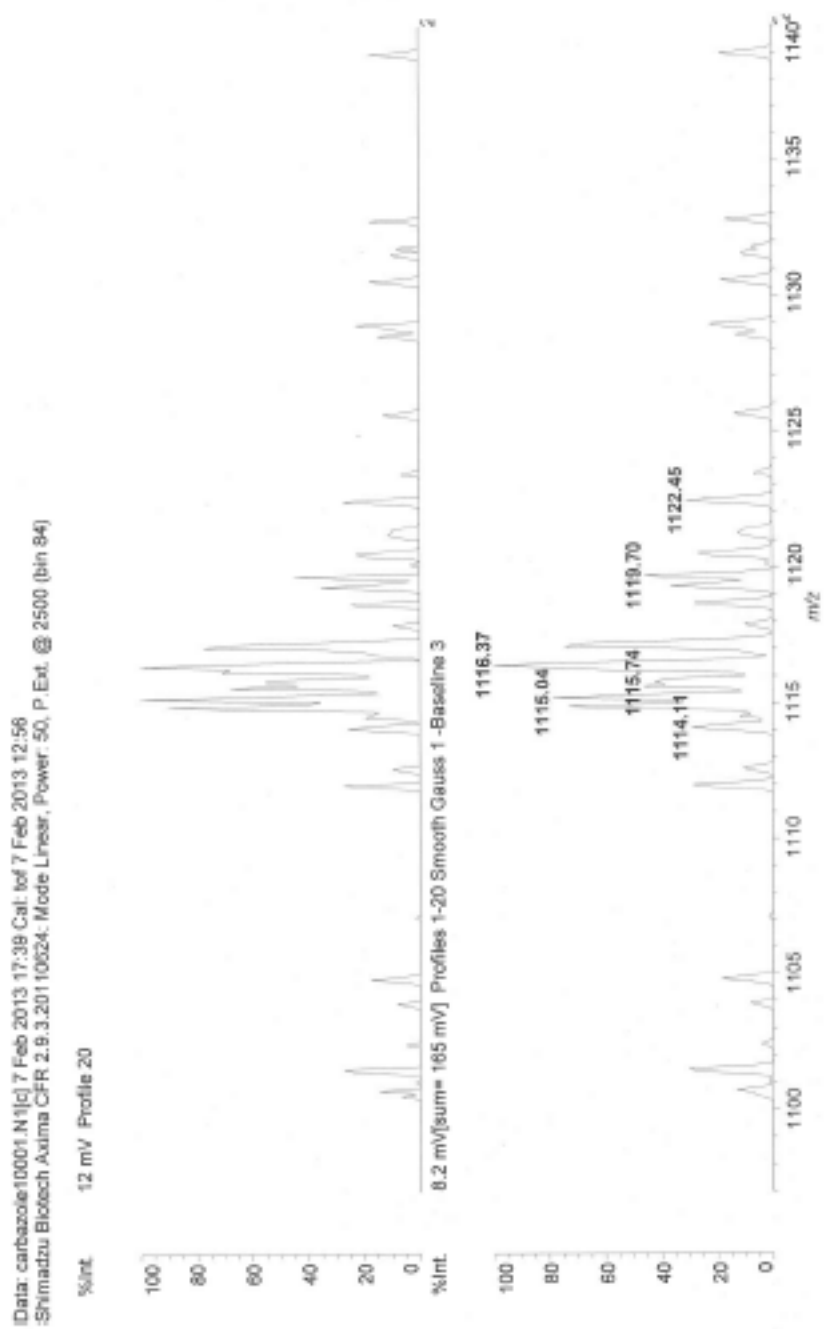

**Figure S1.** MALDI-TOF mass spectra of compound **1**.

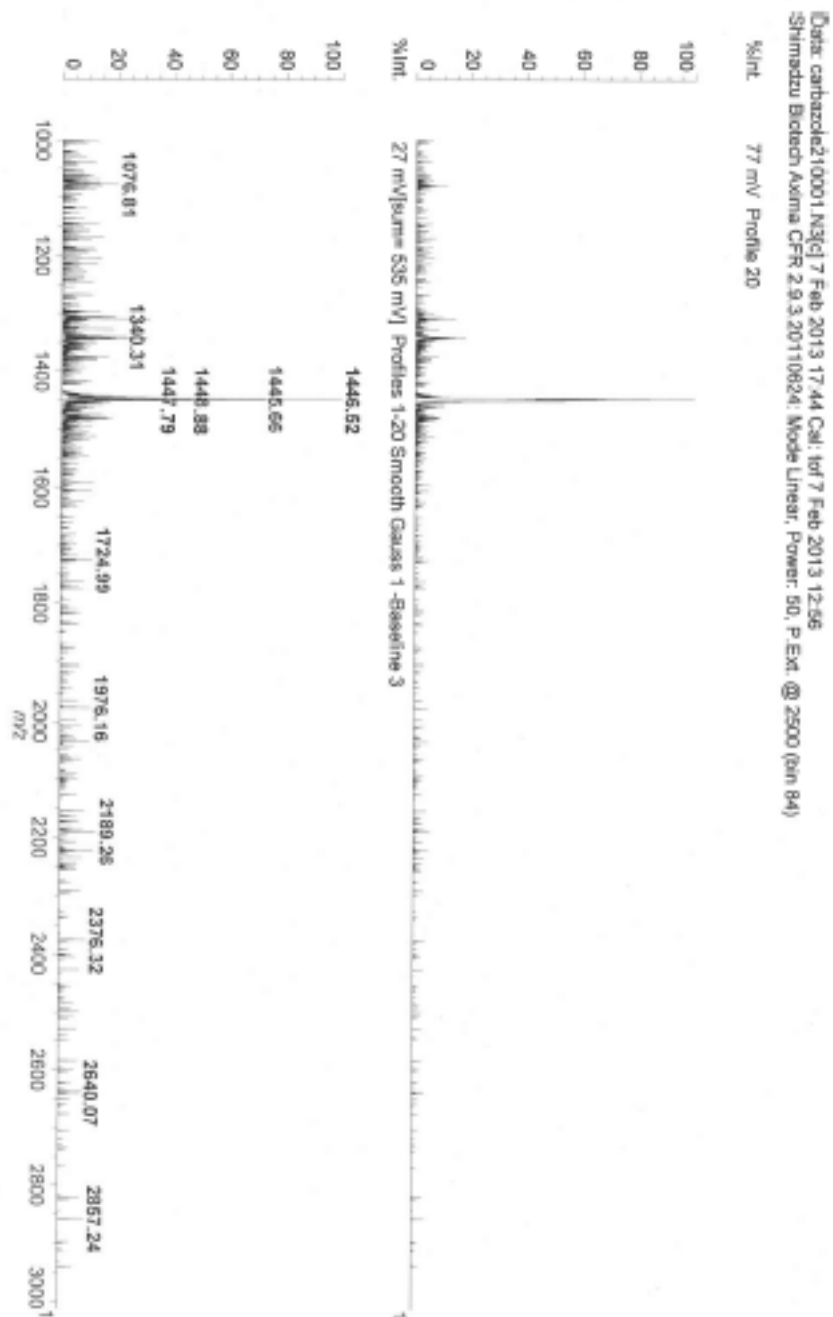

Figure S2. MALDI-TOF mass spectra of compound 2.

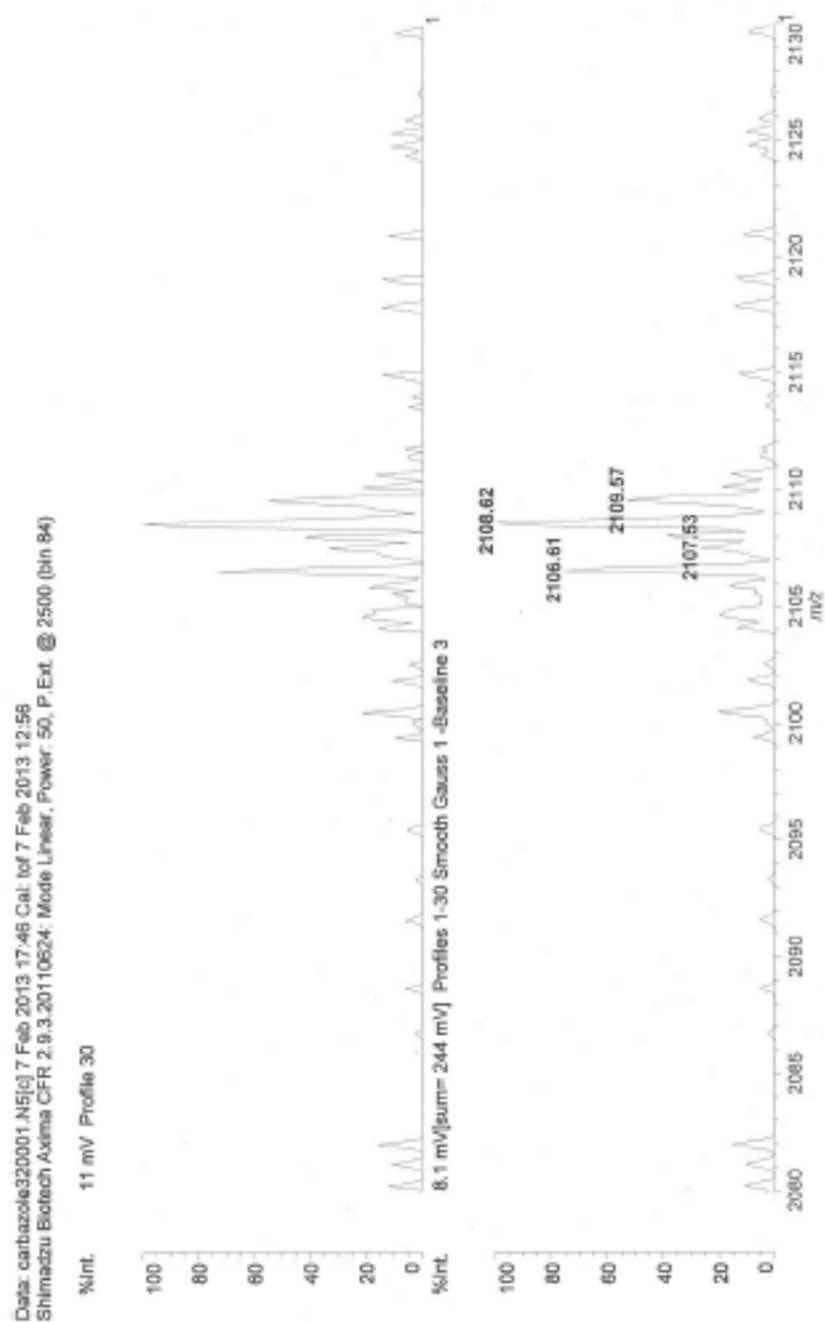

**Figure S3.** MALDI-TOF mass spectra of compound **3**.

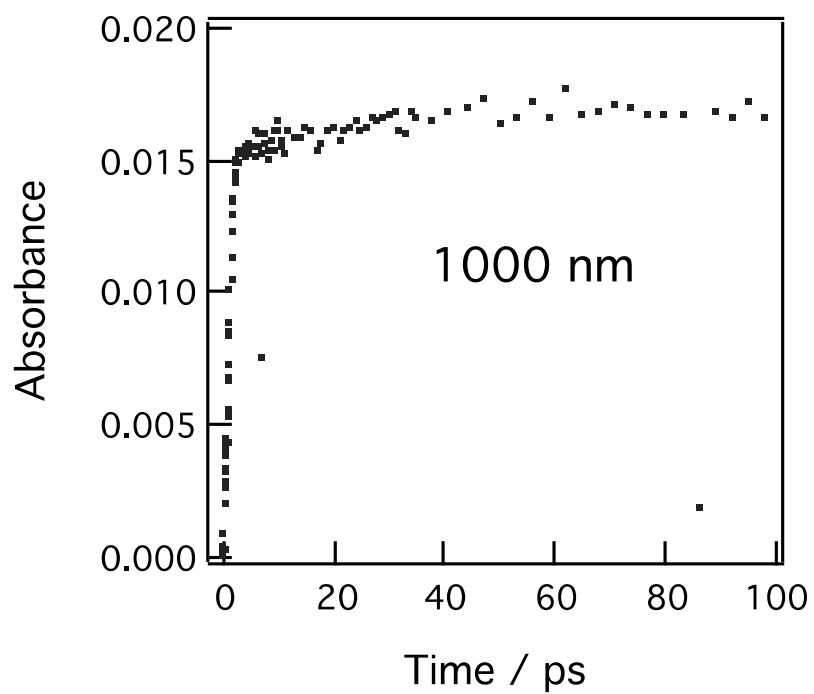

**Figure S4.** Rise profile of the  $C_{60}^-$  of **1** at 1000 nm shown in Figure 4, monitoring charge separation process.

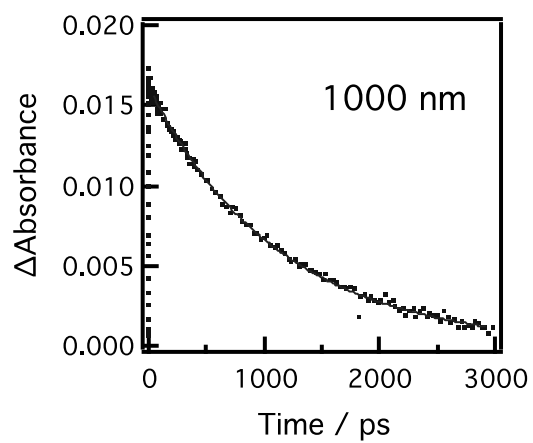

**Figure S5.** Decay profile of the C<sub>60</sub><sup>-</sup> at 1000 nm of **2** in PhCN, monitoring charge separation from carbazole to the singlet C<sub>60</sub>.

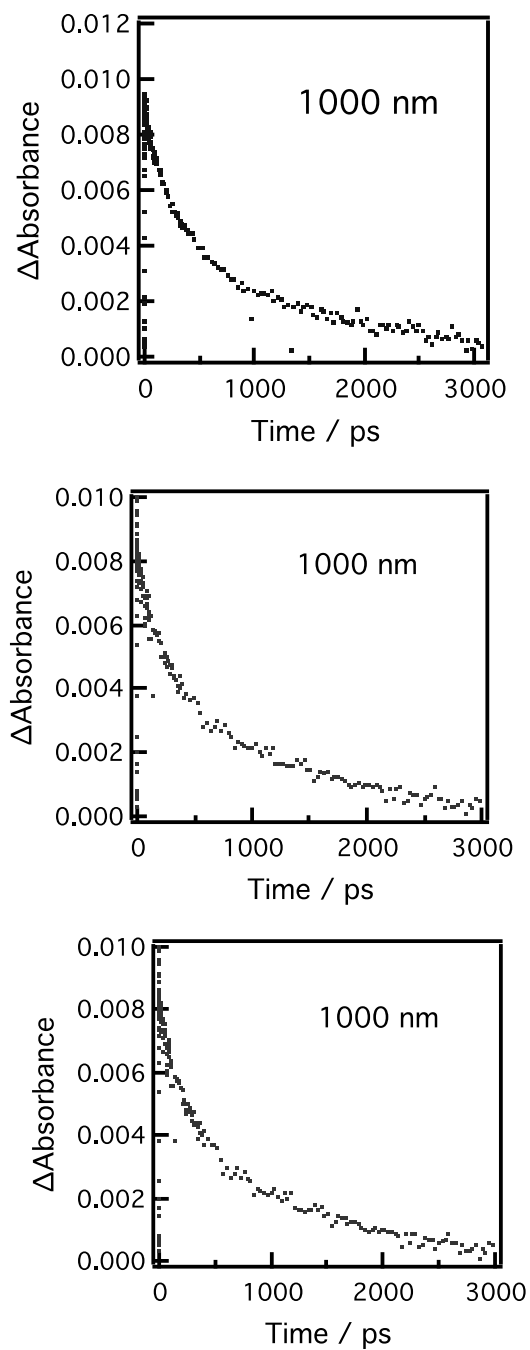

**Figure S6.** Decay Profiles of the  $C_{60}$  radical anion at 1000 nm of **1** (upper figure), **2** (middle figure), and **3** (lower figure) in deaerated DMF. The concentrations are kept at  $1.0 \times 10^{-4}$  M;  $\lambda_{ex} = 390$  nm.



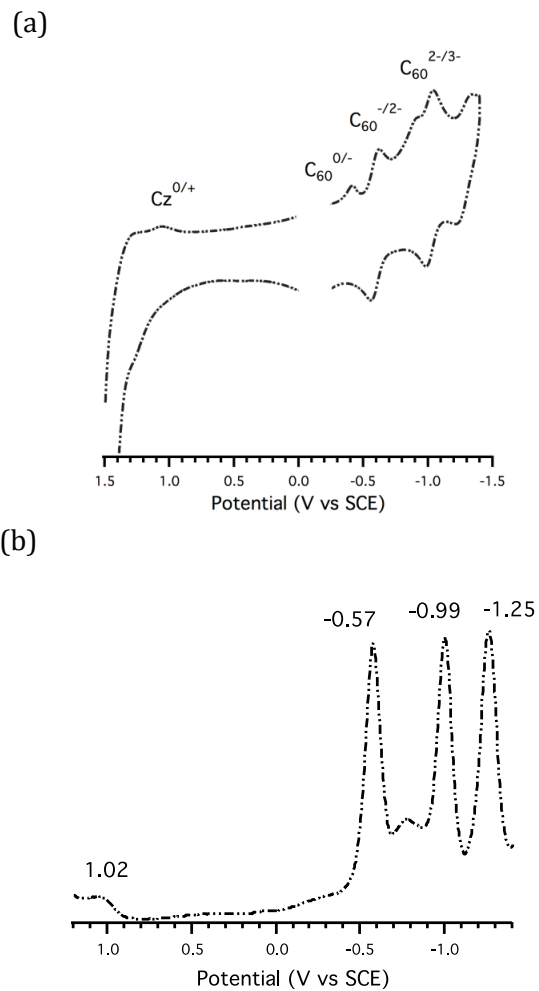

**Figure S7.** (a) CV and (b) DPV of **1** ( $1.0 \times 10^{-4}$  M) in deaerated PhCN with TBAPF<sub>6</sub> (0.1 M) as support electrolyte in PhCN. Scan rate = 20 mV/s.

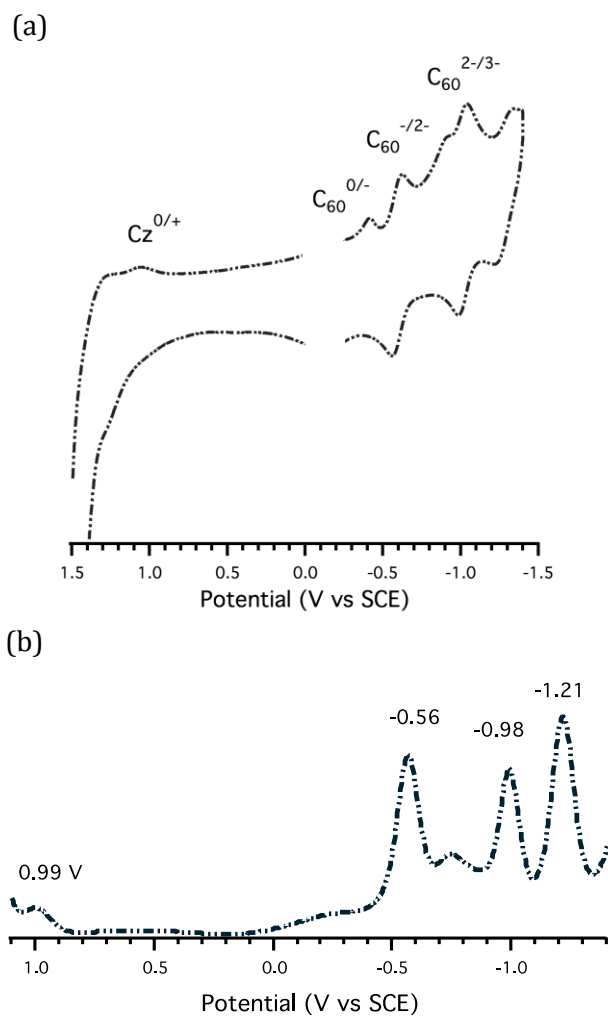

**Figure S8.** (a) CV and (b) DPV of **2** ( $1.0 \times 10^{-4}$  M) in deaerated PhCN with TBAPF<sub>6</sub> (0.1 M) as support electrolyte in PhCN. Scan rate = 20 mV/s.

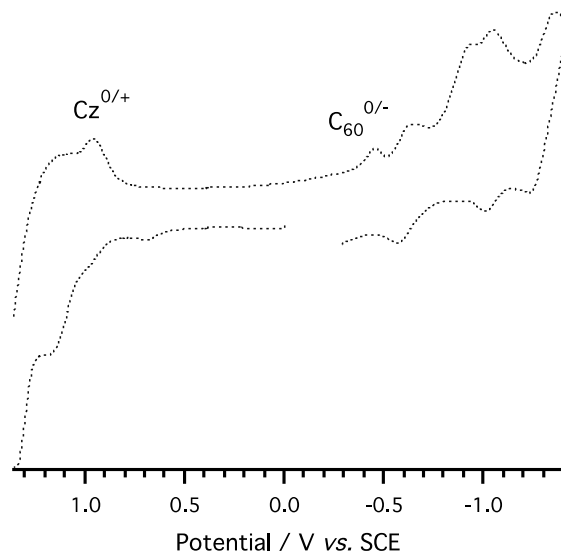

**Figure S9.** (a) CV and (b) DPV of **3** ( $1.0 \times 10^{-4}$  M) in deaerated PhCN with TBAPF<sub>6</sub> (0.1 M) as support electrolyte in PhCN. Scan rate = 20 mV/s.

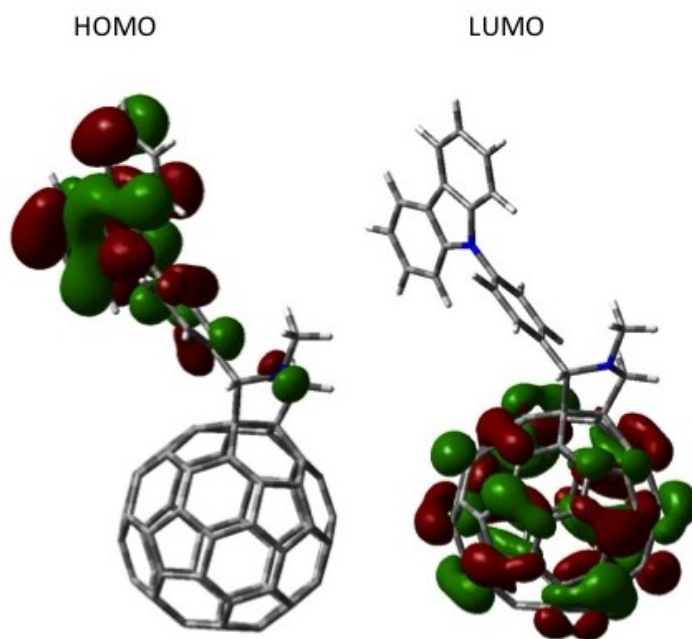

**Figure S10.** Optimized Frontier molecular orbitals of **1** obtained by using *ab initio* B3LYP/6-311G method.

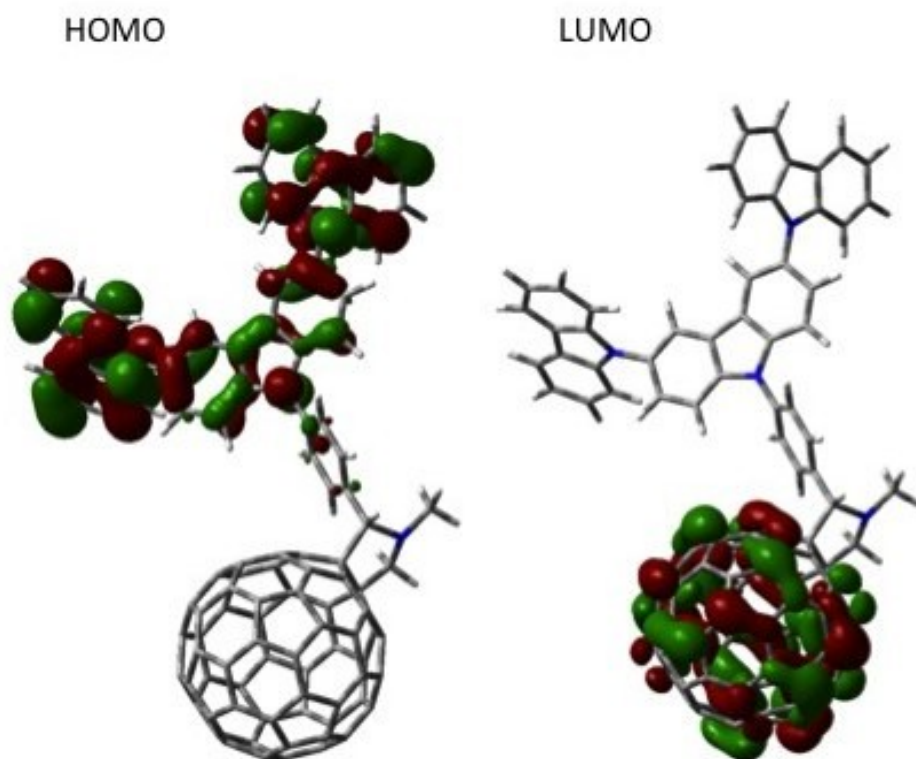

**Figure S11.** Optimized Frontier molecular orbital of **2** obtained by using *ab initio* B3LYP/6-311G method.

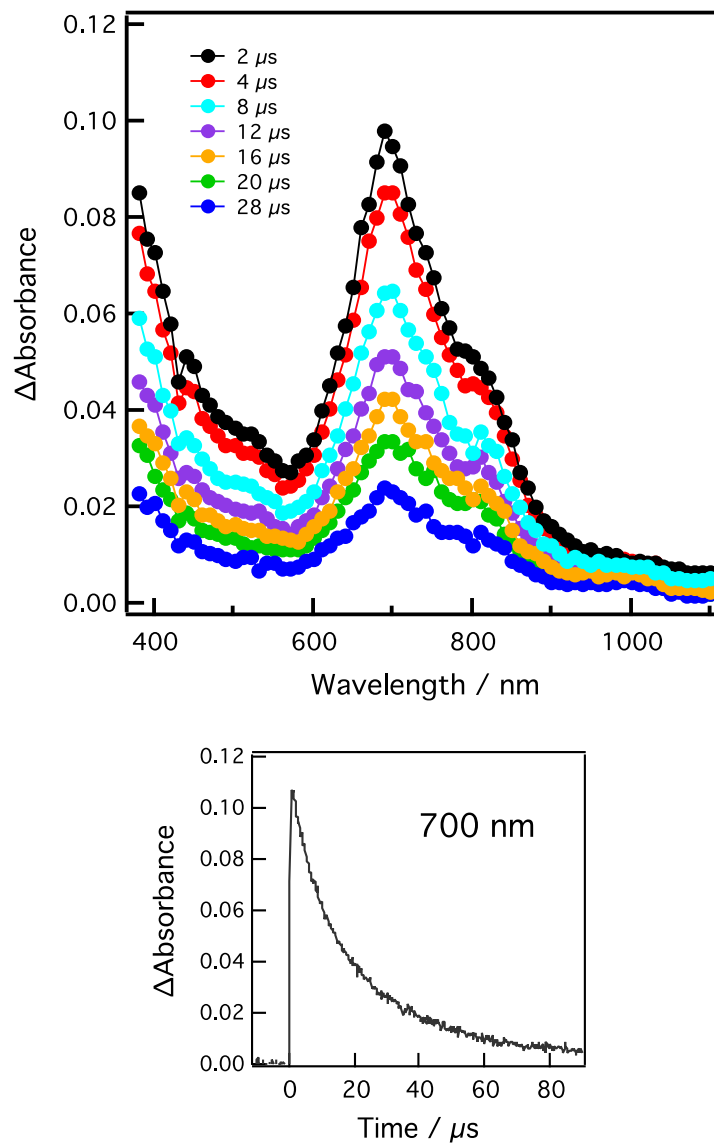

**Figure S12.** (Upper figure) Nanosecond transient absorption spectra of **1** ( $1.0 \times 10^{-4}$  M) in deaerated PhCN;  $\lambda_{\text{ex}} = 430$  nm. (Lower figure) Decay profile of  $^3\text{C}_{60}^*$  at 700 nm.

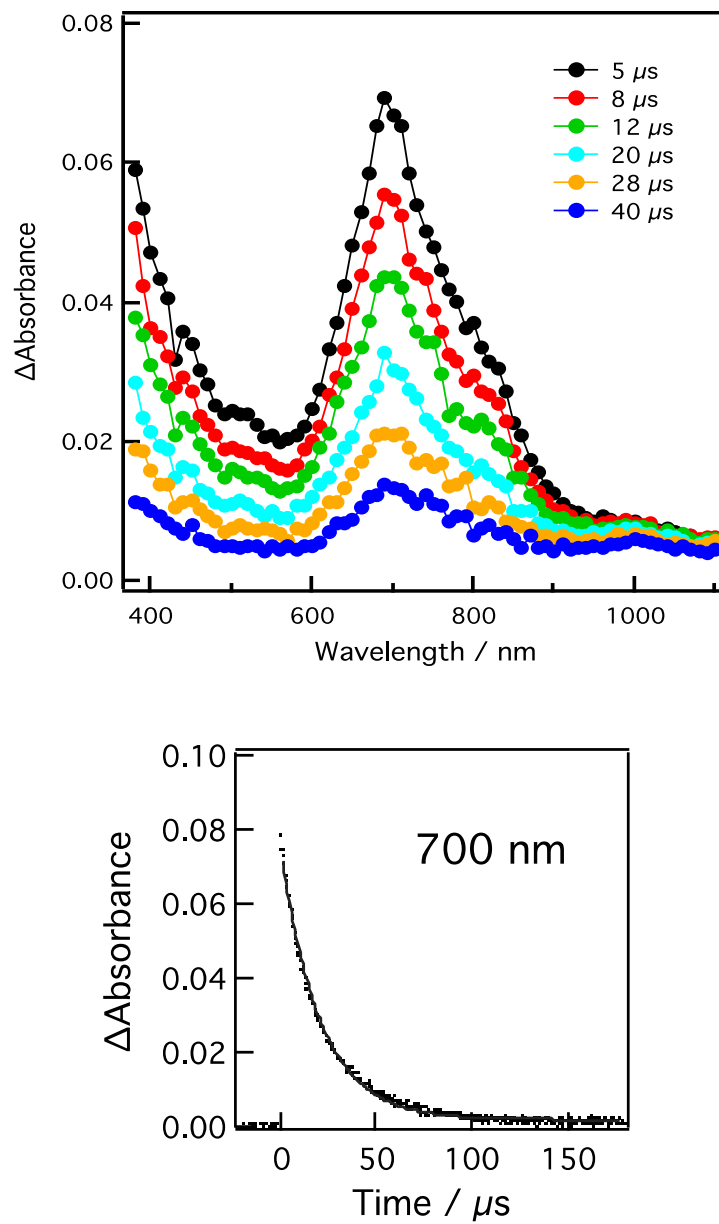

**Figure S13.** (Upper figure) Nanosecond transient absorption spectra of **2** ( $1.0 \times 10^{-4}$  M) in deaerated PhCN;  $\lambda_{\text{ex}} = 430$  nm. (Lower figure) Decay profile of  $^3\text{C}_{60}^*$  at 700 nm.
